# Supplementary material for: High estrogen induces trans-differentiation of vascular smooth muscle cells to a macrophage-like phenotype resulting in aortic inflammation via inhibiting VHL/HIF1a/KLF4 axis
Source: publisher site journal article supplement (doi:10.18632/aging.205904), 2024-06-05
Supplement: Supplementary file [file aging-v16i11-205904-supplementary-material-SD1.pdf]

## SUPPLEMENTARY FIGURES

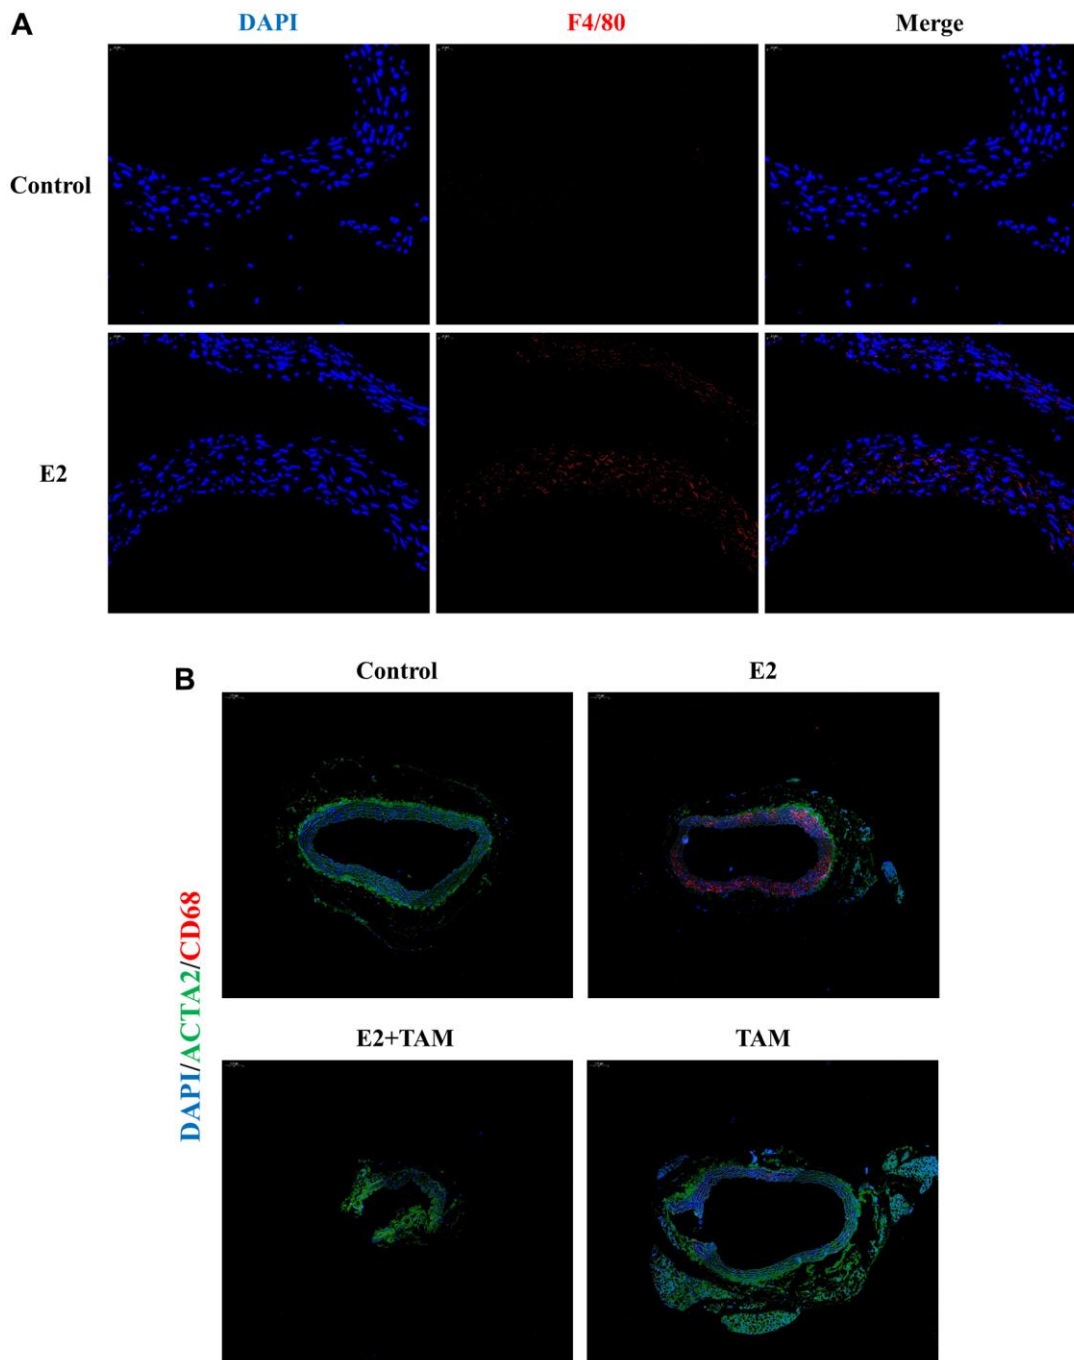

**Supplementary Figure 1. Immunofluorescence staining of mouse aortic cell phenotypic markers.** (A) Mouse aortic tissue sections were done for immunofluorescence staining for macrophage markers (F4/80). Magnification 400 $\times$ . (B) Mouse aortic tissue sections were done for immunofluorescence double staining for smooth muscle cell marker (ACTA2) and macrophage marker (F4/80). Magnification 100 $\times$ .

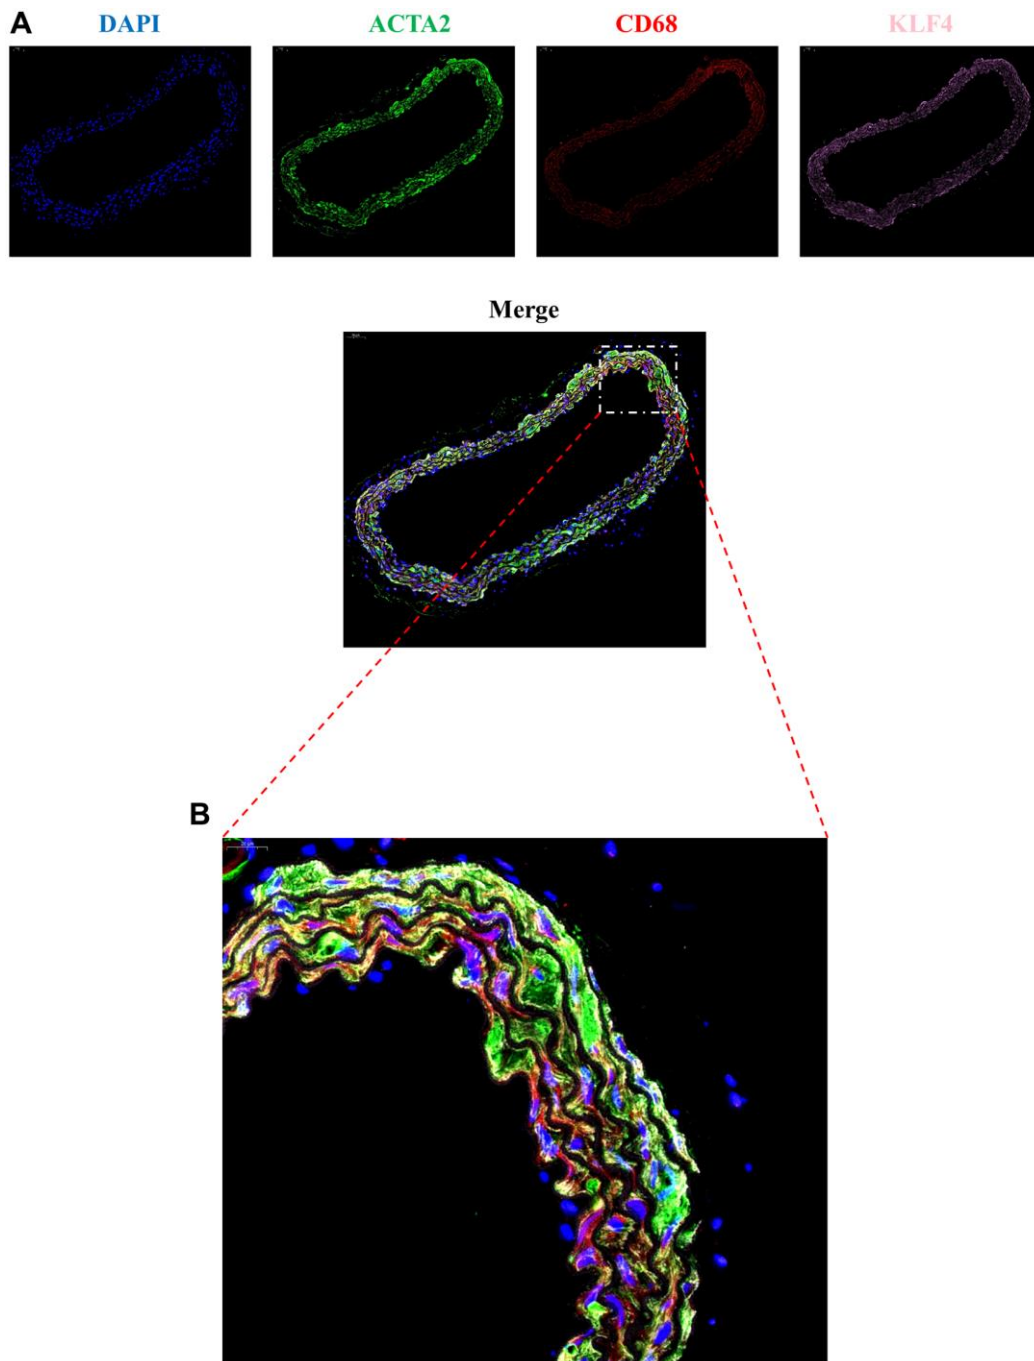

**Supplementary Figure 2. Immunofluorescence staining of KLF4, a phenotypic transforming switch in vascular smooth muscle cells.** (A) Immunofluorescence triple staining for ACTA2, CD68, and KLF4 was done on aortic sections from E2-intervened mice. Magnification 200×. (B) Magnification 630×.

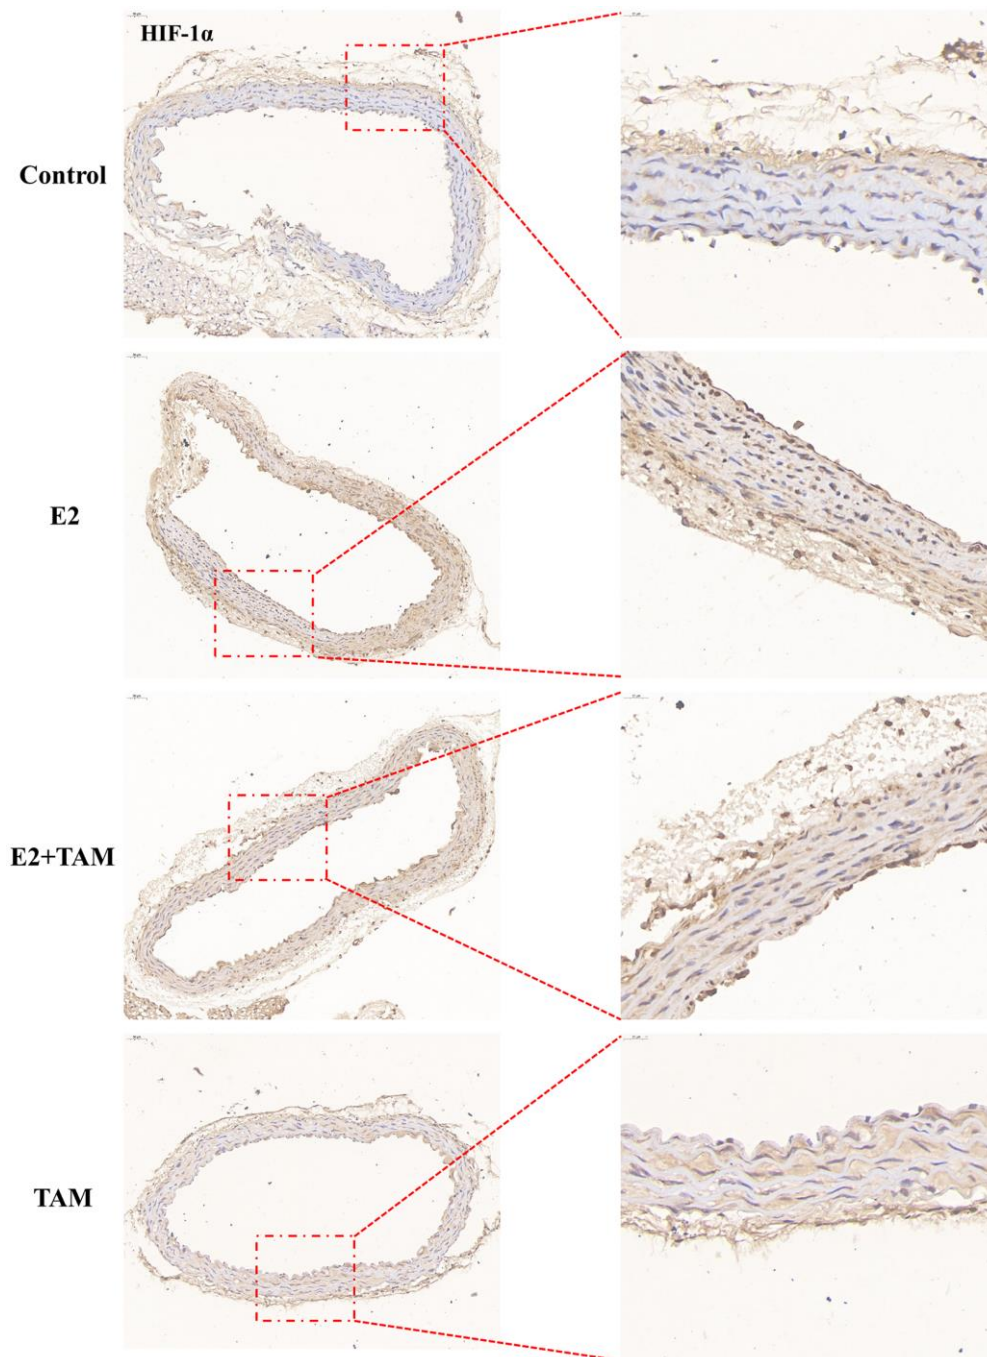

Supplementary Figure 3. Expression of HIF-1 $\alpha$  in the aorta of different groups of mice.
